# Supplementary material
Source: MDPI journal article supplement (https://www.mdpi.com/2071-1050/14/15/9519)
Supplement: s1 [file s1]

# Human Exceptionalist Thinking about Climate Change

Nicole Betz, John D. Coley

## Supplementary Materials

Correspondence can be addressed to John D. Coley at [j.coley@northeastern.edu](mailto:j.coley@northeastern.edu)

### Table of Contents

1. Implicit Exceptionalism Items (Studies 1 and 2)
  - Table S1.** Organisms included in Property Attribution Task, Studies 1 and 2
  - Table S2.** Attributes used in the Property Attribution Tasks, Studies 1 and 2
2. Explicit Exceptionalism Items (Studies 1 and 2)
  - Table S3.** Exceptionalism Statements with Domain-Specific Variants, Studies 1 and 2.
3. Mitigating Attitudes and Mitigating Behaviors Questions, Study 2
  - Table S4.** Items included in Mitigating Attitudes Measure, with Agreement and Mean Ratings, Study 2
  - Table S5.** Items included in Mitigating Behaviors Measure, with Mean Ratings, Study 2

## 1. Implicit Exceptionalism Measure (Studies 1 and 2)

**Table S1. Organisms included in Property Attribution Task, Studies 1 and 2**

| Organism       | Taxonomic    |                                               |
|----------------|--------------|-----------------------------------------------|
|                | Class        | Likelihood to be influenced by Climate Change |
| Human          | Mammal       | High                                          |
| Wolf           | Mammal       | Low                                           |
| Polar Bear*    | Mammal       | High                                          |
| Painted Turtle | Reptile      | Low                                           |
| Alligator      | Reptile      | High                                          |
| Hummingbird    | Bird         | High                                          |
| Dove           | Bird         | Low                                           |
| Salmon         | Fish         | High                                          |
| Anchovy        | Fish         | Low                                           |
| Coral          | Invertebrate | High                                          |
| Red Crab       | Invertebrate | Low                                           |
| Magnolia Tree  | Plant        | High                                          |
| Algae          | Plant        | Low                                           |

*\*Note: For study 2, we replaced ‘polar bear’ with ‘white-tailed deer’ because of the strong association between polar bears and climate change. This was the only difference between this measure across the two studies.*

**Table S2. Attributes used in the Property Attribution Tasks, Studies 1 and 2**

| Scientific Domain | Limited Properties                                       |
|-------------------|----------------------------------------------------------|
| Biology           | Does ____ have a heart?                                  |
|                   | Does ____ breathe?                                       |
| Ecology           | Does ____ get its energy from other organisms?           |
|                   | Does ____ compete with other organisms to survive?       |
| Climate           | Does ____ contribute to climate change?                  |
|                   | Does ____ emit greenhouse gases?                         |
|                   | Will ____ experience habitat loss due to climate change? |
|                   | Will ____ face extinction due to climate change?         |

Response Scale: 1 (Extremely Unlikely) to 7 (Extremely Likely).

## 2. Explicit Exceptionalism Measure (Studies 1 and 2)

**Table S3. Exceptionalism Statements with Domain-Specific Variants, Studies 1 and 2.**

| <b>Biology Variant</b>                                                             | <b>Ecology Variant</b>                                                                    | <b>Climate Change Variant</b>                                                                   |
|------------------------------------------------------------------------------------|-------------------------------------------------------------------------------------------|-------------------------------------------------------------------------------------------------|
| Humans have many genes and enzymes that are extremely different from other species | Humans' ecosystems are extremely different from other species' ecosystems.                | Humans will be impacted by climate change very differently than other species.                  |
| There are many biological processes that are unique to humans.                     | Unlike other species, humans have unique relationships with other animals.                | Humans have many unique attributes that will influence how they are impacted by climate change. |
| Humans are just another animal.                                                    | Like other plants and animals, humans are ecologically interconnected with other species. | Humans are just another organism that will be impacted by climate change.                       |
| Humans are the most highly evolved species.                                        | Humans are at the top of the food chain.                                                  | Of all species, humans are in the best position for surviving in a changing climate.            |
| Humans are not closely related to any other species.                               | Humans do not rely on any other species for survival.                                     | Humans can survive climate change regardless of which other species survive.                    |

Response Scale: 1 (Strongly Disagree) to 7 (Strongly Agree).

### 3. Mitigating Attitudes and Mitigating Behaviors Questions, Study 2

The mitigating attitudes and mitigating behaviors questions were completed by Study 2 participants (undergraduate novices). Below, we report all individual items for the two measures as well as ratings for both Mitigating Attitudes (Table S4) and Mitigating Behaviors (Table S5).

**Table S4. Items included in Mitigating Attitudes Measure, with Agreement and Mean Ratings, Study 2**

| <i>Rate the extent to which you believe the following:</i>                                                           | <i>% Agree</i> | <i>Mean Rating</i> |
|----------------------------------------------------------------------------------------------------------------------|----------------|--------------------|
| 1. I don't believe my behavior and everyday lifestyle contribute to climate change.*                                 | 33%            | 2.5                |
| 2. I would be prepared to pay more for environmentally friendly products.                                            | 73%            | 4.3                |
| 3. If things continue on their current course, we will soon experience a major environmental disaster.               | 10%            | 1.7                |
| 4. The so-called "environmental crisis" facing humanity has been greatly exaggerated.*                               | 9%             | 2.0                |
| 5. Climate change is beyond control--it's too late to do anything about it.*                                         | 91%            | 5.2                |
| 6. The effects of climate change are too far in the future to really worry me.*                                      | 14%            | 2.1                |
| 7. Any change I make to help the environment needs to fit in with my lifestyle.*                                     | 39%            | 3.3                |
| 8. It's not worth me doing things to help the environment if others don't do the same.*                              | 29%            | 2.1                |
| 9. It's not worth the U.S. trying to combat climate change because other countries will just cancel out what we do.* | 9%             | 1.6                |

Response Scale: Agreement: 1 (Not at all agree) to 6 (Fully agree). \*Item was reverse coded.

**Table S5. Items included in Mitigating Behaviors Measure, with Mean Ratings, Study 2**

| <i>Rate the frequency with which you engage in the following activities<sup>1</sup></i> | <i>Mean (SD)</i> |
|-----------------------------------------------------------------------------------------|------------------|
| Read books or magazines about the environment                                           | 5.0 (2.34)       |
| Refuse to buy products with excessive packaging                                         | 5.0 (2.23)       |
| Consider the environmental impact before purchasing products                            | 5.2 (2.27)       |
| Exchange environmental information with friends                                         | 5.5 (2.32)       |
| Seek out information on environmentally conscious behaviors                             | 4.8 (2.37)       |
| Choose to buy locally produced products over cheaper products at an unknown location    | 5.0 (2.07)       |
| <i>Which of these best describes your current lifestyle?<sup>2</sup></i>                | <i>Choice %</i>  |
| I really don't do anything environmentally friendly                                     | 2%               |
| I do one or two things that are environmentally friendly                                | 11%              |
| I do some things that are environmentally friendly                                      | 48%              |
| I do quite a few things that are environmentally friendly                               | 26%              |
| I'm environmentally friendly in most things I do                                        | 12%              |
| I'm environmentally friendly in everything I do                                         | 1%               |

<sup>1</sup>Response scale: 1 (Never) to 7 (At every opportunity)

<sup>2</sup>Participants chose the response that most closely described themselves
